# Supplementary material for: Metabolic Footprint of Diabetes: A Multiplatform Metabolomics Study in an Epidemiological Setting
Source: PubMed Central journal article supplement (PMC2978704; doi:10.1371/journal.pone.0013953), 2010-11-11

# Distribution of R<sup>2</sup> values

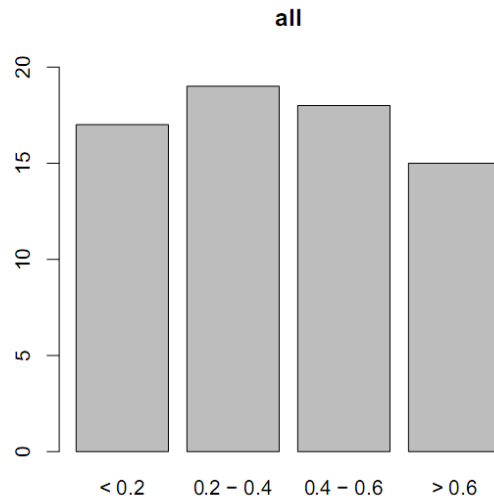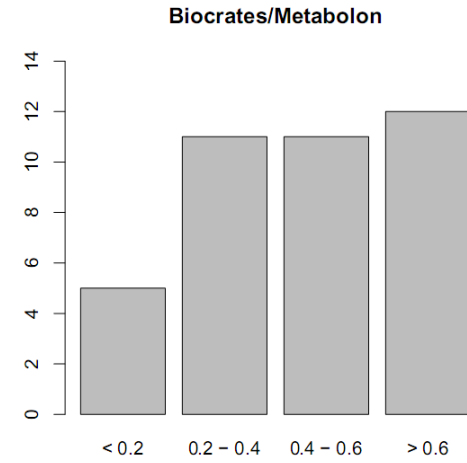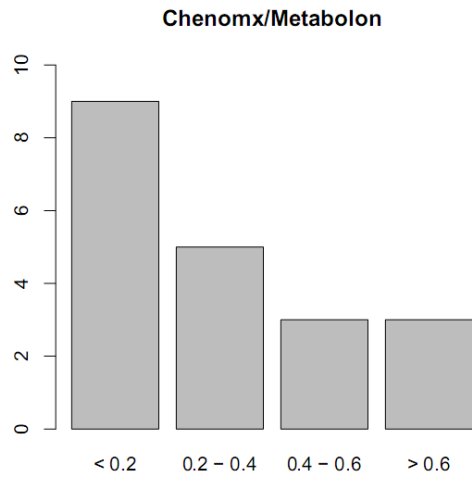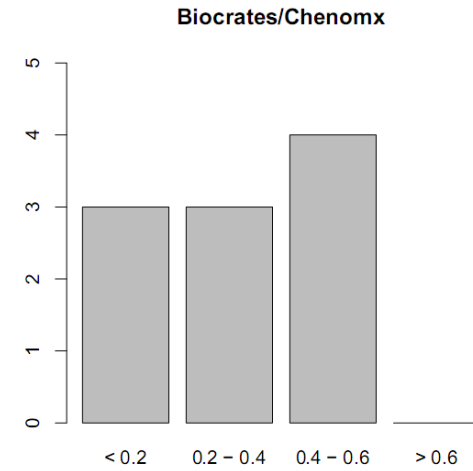

Supplement: pone.0013953.s006.pdf [file pone.0013953.s006.pdf]
